# Supplementary material for: Density of Deep Eutectic Solvents: The Path Forward Cheminformatics-Driven Reliable Predictions for Mixtures
Source: MDPI journal article supplement (doi:10.3390/molecules26195779), 2021-09-24
Supplement: s1 [file s1]

# Density of deep eutectic solvents: The path forward cheminformatics-driven reliable predictions for mixtures

Amit Kumar Halder<sup>a</sup>, Reza Haghbakhsh<sup>b,c</sup>, Iuliia V. Voroshvlova<sup>a</sup>, Ana Rita C. Duarte<sup>c</sup>, M. Natalia D. S. Cordeiro<sup>a\*</sup>

<sup>a</sup>LAQV@REQUIMTE/Department of Chemistry and Biochemistry, Faculty of Sciences, University of Porto, 4169-007 Porto, Portugal

<sup>b</sup>School of Chemical and Petroleum Engineering, Shiraz University, Mollasadra Ave., Shiraz, 71348-51154, Iran

<sup>c</sup>LAQV@REQUIMTE/Department of Chemistry, Faculty of Sciences and Technology, New University of Lisbon, 2829-516, Caparica, Portugal

\* Correspondence: [ncordeir@fc.up.pt](mailto:ncordeir@fc.up.pt)

**Table S5.** Models CO54, MO75 and CO17 derived for the DES' density ( $\rho$  in g/cm<sup>3</sup>) along with their statistical parameters.

| Model | Equation                                                                                                                                                                                                                                                                                                                                                                                                                                                                                                                        | Training set results                                                                                                                                                                                                                                                                                                                    | Test set results                                                                                                                                                                                              |
|-------|---------------------------------------------------------------------------------------------------------------------------------------------------------------------------------------------------------------------------------------------------------------------------------------------------------------------------------------------------------------------------------------------------------------------------------------------------------------------------------------------------------------------------------|-----------------------------------------------------------------------------------------------------------------------------------------------------------------------------------------------------------------------------------------------------------------------------------------------------------------------------------------|---------------------------------------------------------------------------------------------------------------------------------------------------------------------------------------------------------------|
| CO54  | $\rho = +1.180(\pm 0.020) - 0.083(\pm 0.003) \text{TI2\_L}_{\text{pmix}} + 0.348(\pm 0.022) \text{SM1\_Dz(Z)}_{\text{pmix}}$ $+ 0.027(\pm 0.001) \text{Eta\_F}_{\text{pmix}} - 0.028(\pm 0.001) \text{ALOGP}_{\text{pmix}}$ $- 0.112(\pm 0.006) \text{rGes}_{\text{nmix}} + 0.059(\pm 0.006) \text{SpMin2\_Bh(s)}_{\text{pmix}}$ $- 0.0004(\pm 0.0000) T(\text{K})$                                                                                                                                                             | $N_{\text{training}} = 854; R^2 = 0.883; R^2_{\text{Adj}} = 0.882;$<br>$F(7,846) = 914.3;$<br>$Q^2_{\text{LOO}} = 0.881; \text{MAE}_{\text{LOO}} = 0.025;$<br>$r_m^2(\text{LOO}) = 0.831; \Delta r_m^2(\text{LOO}) = 0.099;$<br>$Q^2_{\text{LCO}} = 0.838; \text{MAE}_{\text{LCO}} = 0.030;$<br>$\% \text{AARD}_{\text{tr}} = 2.186$    | $N_{\text{test}} = 300; R^2_{\text{Pred}} = 0.803;$<br>$\text{MAE}_{\text{test}} = 0.030,$<br>$r_m^2(\text{test}) = 0.662;$<br>$\Delta r_m^2(\text{test}) = 0.114;$<br>$\% \text{AARD}_{\text{test}} = 2.491$ |
| MO75  | $\rho = +1.120(\pm 0.021) - 0.020(\pm 0.003) \text{S3K}_{\text{pmix}} + 0.346(\pm 0.012) \text{SM1\_Dz(m)}_{\text{pmix}}$ $+ 0.028(\pm 0.002) \text{SpMax\_EA(dm)}_{\text{pmix}} + 0.013(\pm 0.000) \text{MLOGP2}_{\text{pmix}}$ $- 0.0004(\pm 0.0000) T(\text{K})$                                                                                                                                                                                                                                                             | $N_{\text{training}} = 856; R^2 = 0.867; R^2_{\text{Adj}} = 0.866;$<br>$F(5,850) = 914.3;$<br>$Q^2_{\text{LOO}} = 0.865; \text{MAE}_{\text{LOO}} = 0.025;$<br>$r_m^2(\text{LOO}) = 0.807; \Delta r_m^2(\text{LOO}) = 0.113;$<br>$Q^2_{\text{LCO}} = 0.844; \text{MAE}_{\text{LCO}} = 0.027;$<br>$\% \text{AARD}_{\text{tr}} = 2.246$    | $N_{\text{test}} = 298; R^2_{\text{Pred}} = 0.802;$<br>$\text{MAE}_{\text{test}} = 0.028,$<br>$r_m^2(\text{test}) = 0.726;$<br>$\Delta r_m^2(\text{test}) = 0.101;$<br>$\% \text{AARD}_{\text{test}} = 1.750$ |
| CO17  | $\rho = +0.913(\pm 0.013) + 0.044(\pm 0.001) \text{AMW}_{\text{pmix}} - 0.055(\pm 0.006) \text{Psi\_i\_1d}_{\text{pmix}}$ $+ 0.032(\pm 0.002) \text{SpMax7\_Bh(e)}_{\text{pmix}} + 0.119(\pm 0.010) \text{nRNHR}_{\text{pmix}}$ $+ 0.010(\pm 0.000) \text{MLOGP2}_{\text{pmix}} + 0.013(\pm 0.001) \text{SM13\_AEA(dm)}_{\text{nmix}}$ $- 0.011(\pm 0.000) \text{ATSC8m}_{\text{pmix}} + 0.741(\pm 0.019) \text{ATSC1e}_{\text{pmix}}$ $- 0.032(\pm 0.002) \text{CATS2D\_02\_DL}_{\text{nmix}} - 0.001(\pm 0.0000) T(\text{K})$ | $N_{\text{training}} = 837; R^2 = 0.930; R^2_{\text{Adj}} = 0.929;$<br>$F(10,826) = 1095;$<br>$Q^2_{\text{LOO}} = 0.927; \text{MAE}_{\text{LOO}} = 0.014;$<br>$r_m^2(\text{LOO}) = 0.895; \Delta r_m^2(\text{LOO}) = 0.062;$<br>$Q^2_{\text{LCO}} = 0.891; \text{MAE}_{\text{LCO}} = 0.017;$<br>$\% \text{AARD}_{\text{train}} = 1.136$ | $N_{\text{test}} = 317; R^2_{\text{Pred}} = 0.879;$<br>$\text{MAE}_{\text{test}} = 0.041;$<br>$r_m^2(\text{test}) = 0.627;$<br>$\Delta r_m^2(\text{test}) = 0.116;$<br>$\% \text{AARD}_{\text{test}} = 3.927$ |
